# Supplementary material for: C 1s Peak of Adventitious Carbon Aligns to the Vacuum Level: Dire Consequences for Material's Bonding Assignment by Photoelectron Spectroscopy
Source: PubMed Central journal article supplement — Chemphyschem. 2017 Apr 11;18(12):1507–12. doi: 10.1002/cphc.201700126 (PMC5484993; doi:10.1002/cphc.201700126), 2017-04-11
Supplement: CPHC-18-1507-s001.pdf [file CPHC-18-1507-s001.pdf]

# CHEMPHYSICHEM

## Supporting Information

### **C 1s Peak of Adventitious Carbon Aligns to the Vacuum Level: Dire Consequences for Material's Bonding Assignment by Photoelectron Spectroscopy**

Grzegorz Greczynski\* and Lars Hultman<sup>[a]</sup>

[cphc\\_201700126\\_sm\\_miscellaneous\\_information.pdf](#)

## Methods

The adventitious carbon layers analyzed in this study are accumulated on the surfaces of polycrystalline (TM)N thin films, where TM = Ti, V, Cr, Zr, Nb, Mo, Hf, Ta, and W grown by reactive dc magnetron sputtering in Ar/N<sub>2</sub> gas mixtures. The total pressure  $P_{tot}$  during all depositions is kept constant at 3 mTorr (0.4 Pa), while the N<sub>2</sub>-to-Ar flow ratio is optimized for each target material to obtain stoichiometric single-phase nitrides. Si(001) is used as a substrate and the film growth is performed at the temperature  $T_s$  of 470±12 °C. To minimize surface roughness, the resulting film thickness is kept relatively low, from 140 nm for TiN to 420 nm for WN. Following the growth, the vacuum vessel is evacuated with N<sub>2</sub> (99.999 % pure) once the sample temperature drops below 230 °C in order to ensure consistency of obtained results,<sup>i</sup> which typically requires ~100 min wait. Samples are subsequently exposed to laboratory air (40 % RH, 23 °C) for less than 2 min necessary to transfer them to the ultra-high-vacuum (UHV) XPS system. Further details about (TM)N layers including elemental composition, crystalline structure, and surface roughness can be found in reference <sup>ii</sup>.

C 1s and valence band (VB) XPS spectra are recorded in Axis Ultra DLD instrument (Kratos Analytical, UK) employing monochromatic Al K $\alpha$  radiation ( $h\nu = 1486.70$  eV). The base pressure during spectra acquisition is  $1.1 \times 10^{-9}$  Torr ( $1.5 \times 10^{-7}$  Pa). The same instrument is used for work function  $\phi_{SA}$  measurements performed using ultraviolet photoelectron spectroscopy (UPS) with unmonochromatized He I radiation ( $h\nu = 21.22$  eV).  $\phi_{SA}$  is obtained from the secondary electron cutoff energy in the He I UPS spectra, according to the standard procedure described in detail elsewhere,<sup>iii</sup> with the accuracy of  $\pm 0.05$  eV.  $\phi_{SA}$  of the sputter-cleaned reference Au sample is 5.30 eV, which agrees very well with the textbook values that span from 5.0 to 5.4 eV.<sup>iii</sup> The binding energy scale is calibrated by examining sputter-cleaned Au, Ag, and Cu samples according to the recommended ISO standards for monochromatic Al K $\alpha$  sources that place Au 4f<sub>7/2</sub>, Ag 3d<sub>5/2</sub>, and Cu 2p<sub>3/2</sub> peaks at 83.96, 368.21, and 932.62 eV,

respectively.<sup>iv,v</sup> The Fermi level cut-off for all three metal samples defines the “0” of the BE scale. The charge neutralizer was not used in any of the reported experiments. C 1s peak models are constructed using CasaXPS software,<sup>vi</sup> Shirley type background<sup>vii</sup> (except for the spectra recorded from MoN and WN samples, where linear background was necessary), and Voigt functions with 70% Gaussian contribution.

Samples are first analyzed in the “as-received” state, i.e., following the ~100 min long exposure to residual gases in the growth chamber and <2 min long ambient exposure. After that all TMN surfaces are sputter-etched with 0.5 keV Ar<sup>+</sup> ions incident at an angle of 70° with respect to the sample normal. The ion beam is rastered over a 3×3 mm<sup>2</sup> area, while the analysis area is 0.3×0.7 mm<sup>2</sup> and centered in the middle of the ion-etched crater. XPS and UPS characterization is then performed on cleaned surfaces and following the exposure to laboratory air for 10 min, 100 min, 1 day, 1 week, 1 month, and 7 months. The thickness of AdC layers are estimated from the relative intensities of core level signals using a Hill equation.<sup>viii</sup>

---

<sup>i</sup> G. Greczynski, S. Mráz, L. Hultman, J.M. Schneider, *Appl. Phys. Lett.* **2016**, 108, 041603

<sup>ii</sup> G. Greczynski, D. Primetzhofer, J. Lu, and L. Hultman, *Appl. Surf. Sci.* **2017**, 396, 347

<sup>iii</sup> see for example: Chapter 1 in S. Hüfner “Photoelectron Spectroscopy: Principles and Applications”, 3<sup>rd</sup> Ed. Springer **2003**, ISSN 1439-2674

<sup>iv</sup> M.P. Seah, *Surf. Interf. Anal.* **2001**, 31, 721

<sup>v</sup> ISO 15472, “Surface chemical analysis- x-ray photoelectron spectrometers - calibration of energy scales” (ISO, Geneva, **2001**)

<sup>vi</sup> See N. Fairley “XPS Lineshapes and Curve Fitting” in “Surface Analysis by Auger and X-ray Photoelectron Spectroscopy” Ed. D. Briggs and J.T. Grant, IM Publications, Manchester, **2003**, p.397

<sup>vii</sup> D. A. Shirley, *Physical Review B* **1972**, 5, 4709

<sup>viii</sup> we estimate the thickness  $d$  of the adventitious carbon from the Hill equation:  $d = \lambda \ln(1 + (I_O/s_O)/(I_S/s_S))$ , in which  $I$  stands for signal intensity,  $s$  is the sensitivity factor, and  $\lambda$  is the mean free path for electrons with the energy of 1 keV in the carbon overlayer (here 20 Å, based on values given in Ref. **Fehler! Textmarke nicht definiert.**). Indices “O” and “S” refer to carbon overlayer and the substrate. See: P.J. Cumpson “Angle-resolved XPS” in “Surface Analysis by Auger and X-ray Photoelectron Spectroscopy”, edited by D. Briggs and J.T. Grant, IM Publications and Surface Spectra Limited (UK), 2003.
